# Supplementary material for: A Simple Method of Coupled Merging and Downscaling for Multi-Source Daily Precipitation Data
Source: MDPI journal article supplement (doi:10.3390/rs15184377), 2023-09-06
Supplement: s1 [file s1]

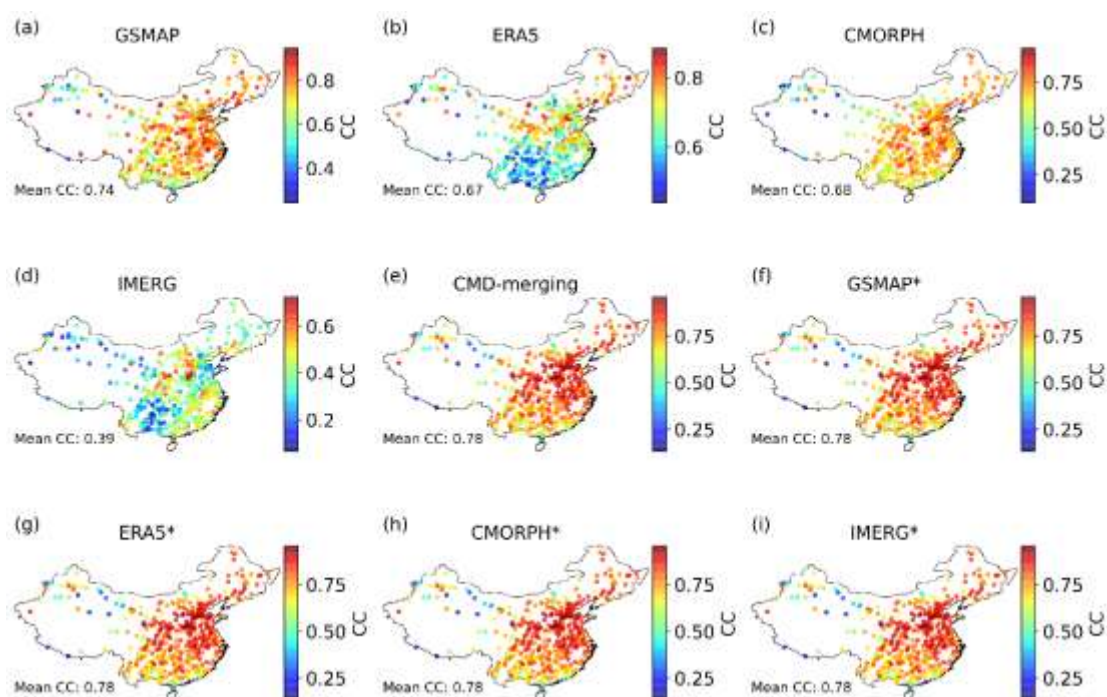

**Figure S1.** Spatial patterns of mean CC values during 2017-2021 of different precipitation datasets in mainland China. \* denotes the individual downscaled precipitation product.

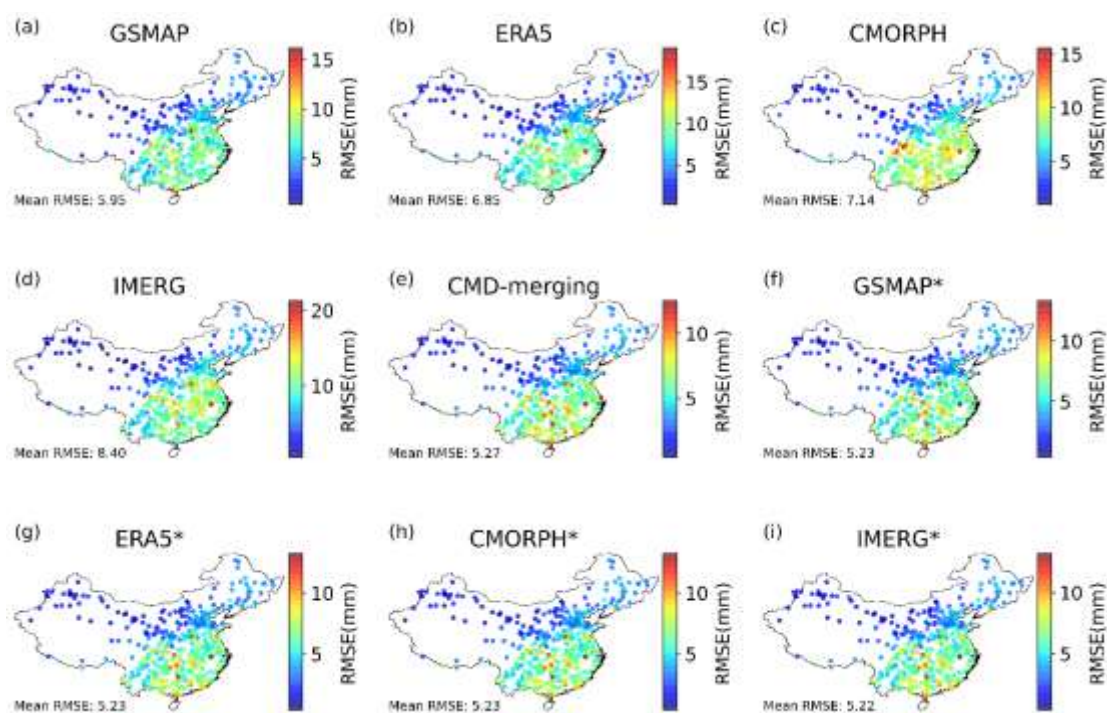

**Figure S2.** Spatial patterns of mean RMSE values during 2017-2021 of different precipitation datasets in mainland China. \* denotes the individual downscaled precipitation product.

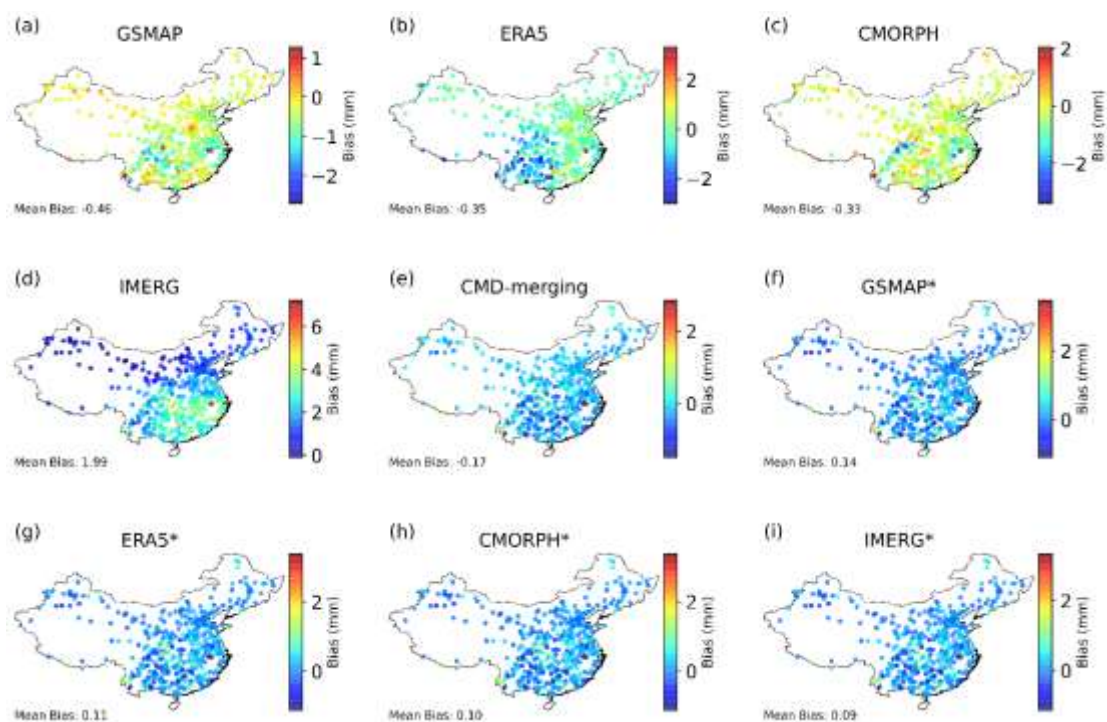

**Figure S3.** Spatial patterns of mean BIAS values during 2017-2021 of different precipitation datasets in mainland China. \* denotes the individual downscaled precipitation product.

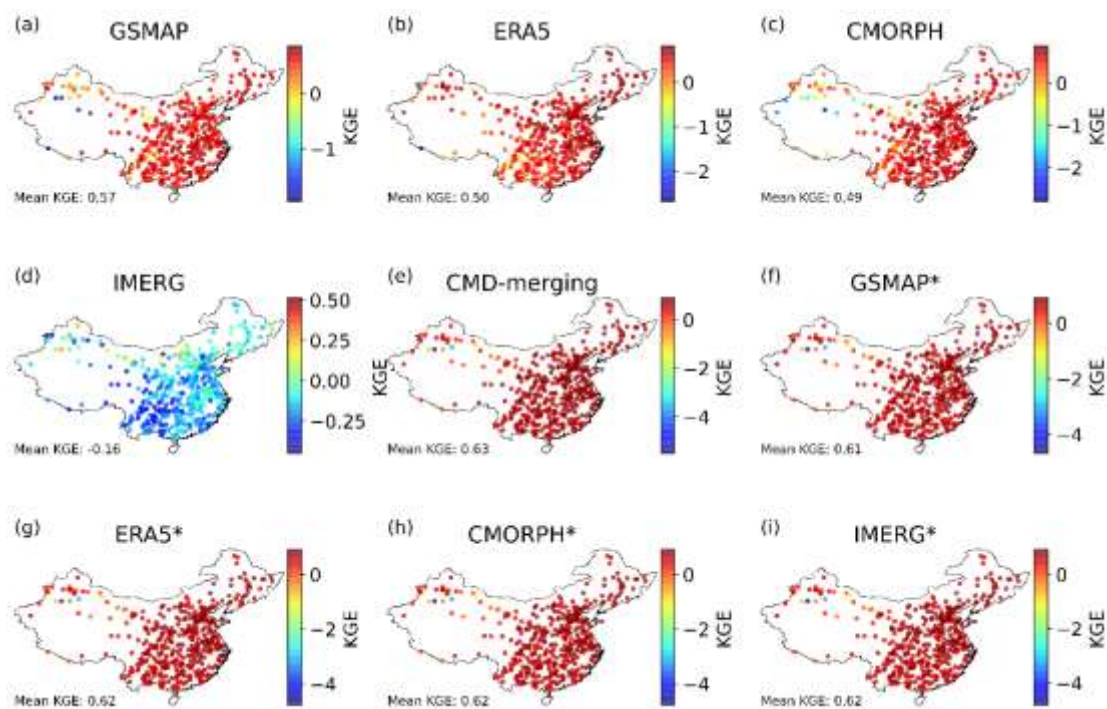

**Figure S4.** Spatial patterns of mean KGE values during 2017-2021 of different precipitation datasets in mainland China. \* denotes the individual downscaled precipitation product.
